# Supplementary material for: Aromatherapie: Mit der Kraft der Natur
Source: Springer Nature journal article supplement (doi:10.1007/s43877-021-0078-6), 2021-02-01
Supplement: MOESM1 [file 18856474]

## Tabelle „Rosmarin und seine Chemotypen“

zum Beitrag „Aromatherapie: Mit der Kraft der Natur“

von Ingeborg Stadelmann

HebammenWissen (2) 1/2021, S. 32-34

|                                                                                                   | Duft                                                | Inhaltstoffe (Flächen%)                                                                                                                                                                                                          | Wirkungen                                                                                                                  | Indikationen                                                                                                                                                    |
|---------------------------------------------------------------------------------------------------|-----------------------------------------------------|----------------------------------------------------------------------------------------------------------------------------------------------------------------------------------------------------------------------------------|----------------------------------------------------------------------------------------------------------------------------|-----------------------------------------------------------------------------------------------------------------------------------------------------------------|
| <b>R. Ct Borneon/<br/>R.Ct. Campher</b><br>Spanien<br><br><b>NICHT</b><br>Schwangere u.<br>Kinder | Krautig- frisch,<br>eukalyptus-,<br>campherartig    | Monoterpene bis zu 26,<br>Limonen: 2,5-5,0<br>M-Alkohole bis 5,0, Linalool: 0,7-1,2<br>M-Oxide: 1,8cineol 16,0-25,0<br>M-Keton:<br>Campher (Borneon) 13-21,0; Verbenon: 0,7-2,5<br>M-Ester 0,5-2,5                               | Neuromuskulär,<br>mukolytisch, analgetisch,<br>cholagog, emmenagog,<br>kardiotonisch, tonisierend                          | Bronchitis, Cholezystitis, Demenz,<br>Amenorrhoe, Herzschwäche,<br>Hypotonie, Antriebslosigkeit,<br>Haarausfall, Rheuma, Venen-<br>schwäche, Krämpfe, Schmerzen |
| <b>R. Ct Cineol</b><br>Marokko                                                                    | Frisch,<br>eukalyptusartig                          | Monoterpene bis zu 14<br>Limonen: 1,5-4,0<br>M-Alkohole bis 5,0, Linalool: 0,4-1,0<br>M-Oxide: 1,8cineol 38-55<br>M-Keton: Campher: 5,0-15,0 Verbenon: max. 0,4<br>M-Ester 0,1 -1,5                                              | mukolytisch, bakterizid<br>(Staph. aureus,<br>Streptokokken, Escheria,<br>Klebsiellen) fungizid,<br>konzentrationsfördernd | Erkältungen, Abszesse, Harnwege,<br>Cystitis, Candida, Rheuma<br>Haare, Schuppen                                                                                |
| <b>R. Ct. Verbenon</b><br>Frankreich, Korsika,<br>Sardinien                                       | Klar, frisch-<br>krautig bis warm,<br>leicht holzig | Monoterpene bis zu 44<br>Limonen: 3,5-4,5<br>M-Alkohole bis 9,0, Linalool: 1,5-4,0, Geraniol 0,5-<br>3,0<br>M-Oxide: 1,8cineol 2,0-10,0<br>M-Keton: Campher: 1,5-11,5 (hoch Südafrika)<br>Verbenon: 3,0-10,5<br>M-Ester 8,5-17,0 | mukolytisch, bakterizid<br>viruzid, choloretisch,<br>kardiotonisch, tonisierend                                            | Atemwege, Enterokolitis, Leber-<br>Galle, Hypotonie, nervöse<br>Müdigkeit, Diabetes, Depression,<br>Hypotonie, Schmerzen<br>Geburtshilfe, Venenschwäche         |
