# Supplementary material for: Aromatherapie: Mit der Kraft der Natur
Source: Springer Nature journal article supplement (doi:10.1007/s43877-021-0078-6), 2021-02-01
Supplement: MOESM2 [file 18856474]

## Literatur

zum Beitrag „Aromatherapie: Mit der Kraft der Natur“  
von Ingeborg Stadelmann

HebammenWissen (2) 1/2021, S. 32-34

F·O·R·U·M (2020) Aromatherapie – Aromapflege – Aromakultur. Hrsg. Forum Essenzia e. V. (56/2020)

Jäger W et al. (1992) Percutaneous absorption of lavender oil from a massage oil. Journal of the Society of Cosmetics Chemists, S. 49-54

Stahl-Biskup E (2020) Arzneipflanzenlexikon <https://www.arzneipflanzenlexikon.info/> (5. Januar 2021)

Steflitsc, W, Wolz D, Buchbauer G (2013) Aromatherapie in Wissenschaft und Praxis. Stadelmann Verlag

Wenigmann M (2017) Phytotherapie- Arzneidrogen, Phytopharmaka, Anwendung. Elsevier

### **Weitere verwendete Literatur**

Heuberger E, Stappen I, Rudolph von Rohr R (2017): Riechen und Fühlen. Wie Geruchssinn, Ängste und Depressionen zusammenspielen. Neue Wege der Behandlung. Fischer & Gann

Lis-Balchin M (2006) Aromatherapy Science. A guide for healthcare professionals. Pharmaceutical Press

Schilcher H, Kammerer S, Wegener T (2016) Leitfaden Phytotherapie. Elsevier

Stadelmann I (2020) Aromamischungen für Mutter und Kind. Stadelmann Verlag

Stadelmann I (2018) Die Hebammen-Sprechstunde. Stadelmann Verlag

Stadelmann I (2009) Bewährte Aromamischungen. Stadelmann Verlag

Teuscher E, Melzig M, Lindequist U (2020) Biogene Arzneimittel. Wissenschaftliche Verlagsgesellschaft

Tisserand RB, Young R (2014) Essential Oil Safety. Churchill Livingstone Elsevier
